# Supplementary material
Source: ML conference proceedings conference paper supplement (https://proceedings.neurips.cc/paper_files/paper/2017/hash/b2eeb7362ef83deff5c7813a67e14f0a-Abstract.html)
Supplement: Supplementary file [file b2eeb7362ef83deff5c7813a67e14f0a-Supplemental.zip]

---

# Matching on Balanced Nonlinear Representations for Treatment Effects Estimation

## Supplementary Document

---

**Sheng Li**  
Adobe Research  
San Jose, CA  
sheli@adobe.com

**Yun Fu**  
Northeastern University  
Boston, MA  
yunfu@ece.neu.edu

### 1 Proof of Proposition 1

The objective function of the proposed balanced and nonlinear representations (BNR) model is:

$$\begin{aligned} \arg \max_P \quad & F(P, \Phi(X), Y_c) - \beta \text{Dist}(\Psi(X_C), \Psi(X_T)) \\ & = \text{tr}(P^\top (\alpha K_W - K_I) P) - \beta \text{tr}(P^\top K L K P), \\ \text{s.t.} \quad & P^\top P = I, \end{aligned} \quad (1)$$

where  $\beta$  is a trade-off parameter to balance the effects of two terms. A negative sign is added before  $\beta \text{Dist}(\Psi(X_C), \Psi(X_T))$  in order to adapt it into this maximization problem.

The problem Eq.(1) can be efficiently solved by using a closed-form solution described in Proposition 1.

**Proposition 1** *The optimal solution of  $P$  in problem Eq.(1) is the eigenvectors of matrix  $(\alpha K_I - K_W - \beta K L K)$ , which correspond to the  $m$  leading eigenvalues.*

**Proof.** The Lagrangian function of Eq.(1) is:

$$\mathcal{L} = \text{tr}(P^\top (\alpha K_I - K_W - \beta K L K) P) - \text{tr}((P^\top P - I)Z), \quad (2)$$

where  $Z$  is a Lagrangian multiplier.

By setting the derivative of Eq.(2) w.r.t.  $P$  to zero, we have:

$$\frac{\partial \mathcal{L}}{\partial P} = (\alpha K_I - K_W - \beta K L K) P = P Z. \quad (3)$$

Eq.(3) is a standard eigen-decomposition problem. Therefore, the optimal solution of  $P$  in Eq.(1) is the eigenvectors of matrix  $(\alpha K_I - K_W - \beta K L K)$  corresponding to the  $m$  leading eigenvalues.  $\square$

## 2 Experimental Settings and Additional Results

### 2.1 Additional Results on Synthetic Dataset

To illustrate the sensitivity of parameter settings, Figure 1 (a) and (b) show the ATT with different values of  $\beta$  and different number of categories  $c$ , respectively, when the dimension is increased from 2 to 20. The ground truth of ATT is 1. We can observe that most of the estimations are quite close to 1 (shown as dashed lines), and therefore the median value of those estimations will be close to 1 as well. These results demonstrate that the proposed BNR-NNM estimator is able to provide a robust estimation of causal effect.

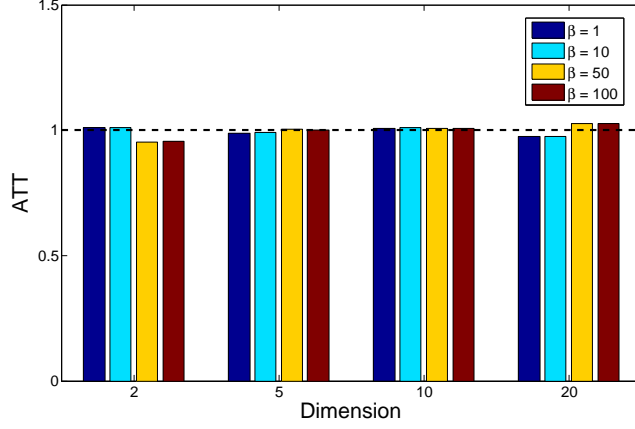

(a) ATT with different values of  $\beta$ , when  $c = 4$  and  $\alpha = 1$ .

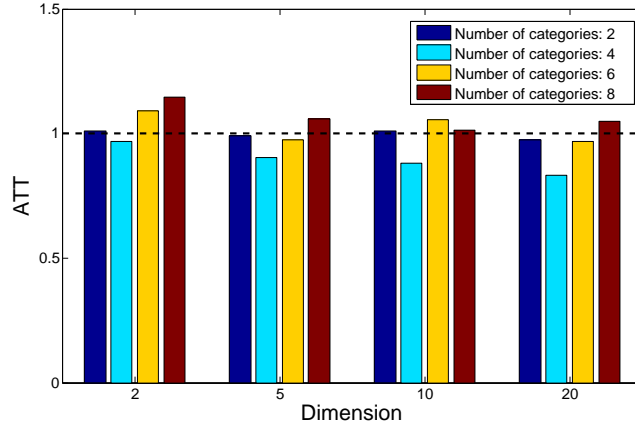

(b) ATT with different number of categories ( $c$ ), when  $\beta = 1$  and  $\alpha = 1$ .

Figure 1: ATT estimated by our approach using different settings on synthetic dataset. The ground truth of ATT is 1.

## 2.2 Outcome Simulation Procedures on IHDP Dataset

Given the covariate matrix  $X$  and treatment indicator vector  $T$ , we follow the procedures suggested by Hill [1] to simulate the outcomes:

- $Y(0) = \exp((X + W)\beta) + Z_0$ , where  $W$  is an offset matrix with every element equal to 0.5;  $\beta \in \mathbb{R}^{d \times 1}$  is a vector of regression coefficients (0, 0.1, 0.2, 0.3, 0.4) randomly sampled with probabilities (0.6, 0.1, 0.1, 0.1, 0.1);  $Z_0 \in \mathbb{R}^{n \times 1}$  is a vector of elements randomly sampled from the standard normal distribution  $N(0, 1)$ .
- $Y(1) = X\beta - \omega + Z_1$ , where  $\beta$  follows the same definition as described above.  $\omega \in \mathbb{R}^{n \times 1}$  is a vector with every element to some constant that makes ATT equal to 4. Similar to  $Z_0$ ,  $Z_1 \in \mathbb{R}^{n \times 1}$  is also a vector of elements randomly drawn from the standard normal distribution  $N(0, 1)$ .
- The factual outcome vector is defined as  $Y^F = Y(1) \odot T + Y(0) \odot (1 - T)$  and the counterfactual outcome vector  $Y^{CF} = Y(1) \odot (1 - T) + Y(0)^T$ , where  $\odot$  represents the element-wise product.

## 2.3 Evaluation on Efficiency

Although the proposed BNR-NNM involves a representation learning process and model selection procedures, it is still efficient compared with the existing matching estimators. The efficiency of BNR-NNM leverages on the following factors: (1) matching in low-dimensional representation space

Table 1: Computing time (in seconds) of different estimators on synthetic dataset.

| Method         | Time (seconds) |
|----------------|----------------|
| Eu-NNM         | 0.07           |
| Mah-NNM        | 1.79           |
| PSM            | 0.27           |
| PCA-NNM        | 0.04           |
| LPP-NNM        | 0.25           |
| RNNM           | 0.02           |
| BNR-NNM (Ours) | 0.35           |

is much faster than in the original high-dimensional covariate space; (2) BNR has a closed-form solution; (3) multiple parameter settings can be executed in parallel. Moreover, we empirically evaluate the runtime behavior of BNR-NNM and other baselines on the synthetic dataset. The sample size is 1000 and the dimension of covariates is 100. For PCA-NNM, LPP-NNM, RNNM, and our method, we reduce the dimension of covariates from 100 to 5. Table 1 shows the computing time of different estimators. We can observe that the time cost of our estimator is comparable with that of other baselines.

## References

- [1] Jennifer L Hill. Bayesian nonparametric modeling for causal inference. *Journal of Computational and Graphical Statistics*, 20(1):217–240, 2012.
